# Supplementary material
Source: PubMed Central journal article supplement (PMC4019026)
Supplement: MCB.01484-13_zmb999100412so1.pdf [file MCB.01484-13_zmb999100412so1.pdf]

## Supporting Information

### **Endoplasmic reticulum stress-activated transcription factor ATF6 $\alpha$ requires the disulfide isomerase PDIA5 to modulate chemoresistance**

Arisa Higa<sup>1,6</sup>, Said Taouji<sup>1</sup>, Stéphanie Lhomond<sup>1</sup>, Devon Jensen<sup>2</sup>, Martin E. Fernandez-Zapico<sup>3</sup>, Jeremy C Simpson<sup>4</sup>, Jean-Max Pasquet<sup>5</sup>, Randy Schekman<sup>2</sup> and Eric Chevet<sup>1</sup>

<sup>1</sup>INSERM U1053, Université Bordeaux Segalen, Bordeaux, France. <sup>2</sup>Department of Molecular and Cell Biology, University of California at Berkeley, Berkeley, CA, USA. <sup>3</sup>Schulze Center for Novel Therapeutics, Division of Oncology Research, Mayo Clinic, Rochester, MN, USA. <sup>4</sup>School of Biology & Environmental Science and Conway Institute of Biomolecular & Biomedical Research, University College Dublin, Belfield, Dublin 4, Ireland. <sup>5</sup>INSERM U1035, Université Bordeaux Segalen, Bordeaux, France.

Correspondence to Eric Chevet, Inserm U1053, Université Bordeaux Segalen, 146 rue Léo Saignat, 33000 Bordeaux, France. Tel. +33(0)557579253; email [eric.chevet@inserm.fr](mailto:eric.chevet@inserm.fr)

<sup>6</sup>Present address: Medical Industry Translational Research Centre, Fukushima Medical University, 1 Hikarigaoka, Fukushima, 960-1295

**Table S1. List of siRNAs used for screening and knock down experiments**

|                                | <b>Sense</b>           | <b>Antisense</b>        |
|--------------------------------|------------------------|-------------------------|
| <b>AGR2</b>                    | CUGAUUAGGUUUAUGGUUUAAU | UAAACCAUAACCUAAUCAGUU   |
| <b>ATF6</b>                    | GGCAGGACUACGAAGUGAUGA  | AUCACUUCGUAGUCCUGCCCA   |
| <b>EP58</b>                    | GGUCCUUCUAUGUAAGAUACA  | UAUCUUACUAUGAAGGACCCA   |
| <b>ER29</b>                    | CACUGGGGCAGUUAAGGUUGG  | AACCUUAACUGCCCAGUGUA    |
| <b>ERdj5-(I)</b>               | CUUCAACGAACUAGUUACACA  | UGUAACUAGUUCGUUGAAGGU   |
| <b>ERdj5-(II)</b>              | GCAUAUGAAGUACUCAAGUU   | CUUUGAGUACUUCUAUUGCUC   |
| <b>ERO1L<math>\beta</math></b> | CAAGCCUCGAUCGUUUUAUCG  | AUAAACAGAUCCGAGGCUUGAA  |
| <b>Ero1p</b>                   | CGAGCGCCAGAUUUUCAACU   | UUGAAAUCUGGGCGCUCGAA    |
| <b>ERp18</b>                   | CUCCUCGCACUUAAGUAUUUG  | AAUACUUAAGUGCGAGGAGUA   |
| <b>ERp44-(I)</b>               | GAAGUAGCUCGGCAUUUAUA   | UUAUUUGCCGAGCUACUUCAU   |
| <b>ERp44-(II)</b>              | CUCUAUUGAGGGAUCGAGAUG  | UCUCGAUCCCUCAAUAGAGUA   |
| <b>PDIA1-(I)</b>               | GGACGGUCAUUGAUUACA AUU | UUGUAAUCAAUAGCCGUCCUG   |
| <b>PDIA1-(II)</b>              | CGCUGGAUGGUUUUAAGAAUU  | UUCUUA AAAACCAUCCAGCCUG |
| <b>PDIA2</b>                   | CGCUUGGUCAACCUUGAAACC  | UUUCAAGGUUGACCAAGCGCA   |
| <b>PDIA3-(I)</b>               | GGAAUAGUCCCAUJAGCAAUU  | UUGCUAAUGGGGACUAUUCUU   |
| <b>PDIA3-(II)</b>              | CCCUGAAGAUUUUAGAGAUU   | UCUCUAAAUAUCUUCAGGGUU   |
| <b>PDIA4-(I)</b>               | GCGAGUUUGUCACUGCUUUUU  | AAAGCAGUGACAAACUCGCGG   |
| <b>PDIA4-(II)</b>              | CUAACAACCUGAGAGAAGAUU  | UCUUCUCUCAGGUUGUUAGCG   |
| <b>PDIA5-(I)</b>               | CCUCGCUCAUUGAGAGAAUCU  | AUUCUCUCAAUAGCGAGGAG    |
| <b>PDIA5-(II)</b>              | GGAUGAUGCCGCAUUUCCA UU | UGGAAAUGCGGCAUCAUCCUC   |
| <b>PDIA6</b>                   | GCGAGUCUCCUGUGGAUU AUG | UAAUCCACAGGAGACUCGCCU   |
| <b>TMX</b>                     | GAGUGGACGGUUUAUCAU AAA | UAUGAUAAACCGUCCACUCAG   |

**Table S2. List of primers used for q-PCR**

|                                | <b>Forward primer (5'-3')</b> | <b>Reverse primer (5'-3')</b> |
|--------------------------------|-------------------------------|-------------------------------|
| <b>BiP</b>                     | GCTTATGGCCTGGATAAGAGG         | CCACAACCTCGAAGACACCAT         |
| <b>Chop</b>                    | ACCAAGGGGAGAACCAGGAAACG       | TCACCATTTCGGTCAATCAGAGC       |
| <b>Ero1L<math>\beta</math></b> | GGTTTAGGAACTGCCCTGAAG         | CAACTATTTCTGTCTGGGTGA         |
| <b>Gadd34</b>                  | CCTCTACTTCTGCCTTGTCTCCAG      | TTTTCTCCTTCTCCTCGGACG         |
| <b>Grp94</b>                   | CTATTCGCCTTCTTGTAGC           | CCTCTTGGGTCAGCAATTACA         |
| <b>Herpud1</b>                 | TCCTCCTCCTGACGTTGTA AA        | TGCTCGCCATCTAGTACATCC         |
| <b>Orp150</b>                  | GAAGATGCAGAGCCCATTTT          | TCTGCTCCAGGACCTCCTAA          |
| <b>Pdia5</b>                   | ACTGCTCAGAACCCGGAATA          | GATGGTCCCTTGTCTTTTCA          |
| <b>Xbp1</b>                    | GGAACAGCAAGTGGTAGA            | CTGGAGGGGTGACAAC              |
| <b>Gapdh</b>                   | AAGGTGAAGGTCGGAGTCAA          | CATGGGTGGAATCATATTGG          |

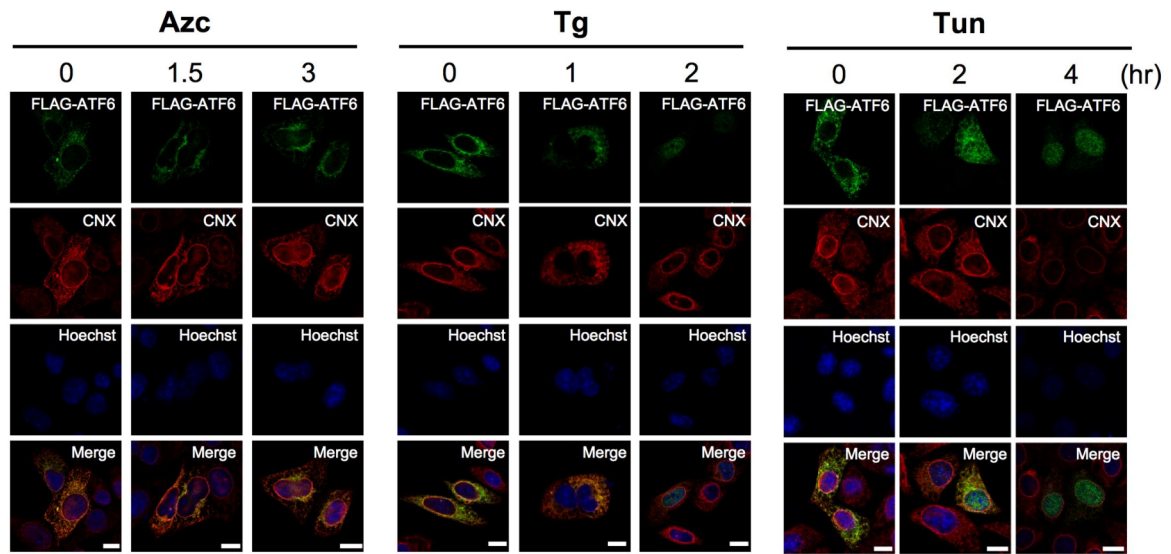

**Fig. S1. ATF6 $\alpha$  activation assay.** HeLa cells transfected with FLAG-ATF6 $\alpha$  plasmid for 24 h and treated with Azetidin-2-carboxylic acid (Azc, 10 mM), Thapsigargin (Tg, 500 nM) or Tunicamycin (Tun, 5  $\mu$ g/ml) for the indicated time. Cells were then immunostained with anti-FLAG and anti-CNX (for ER) or anti-Giantin (for Golgi) antibodies. Cells were analyzed by confocal microscope. Bars, 10  $\mu$ m.

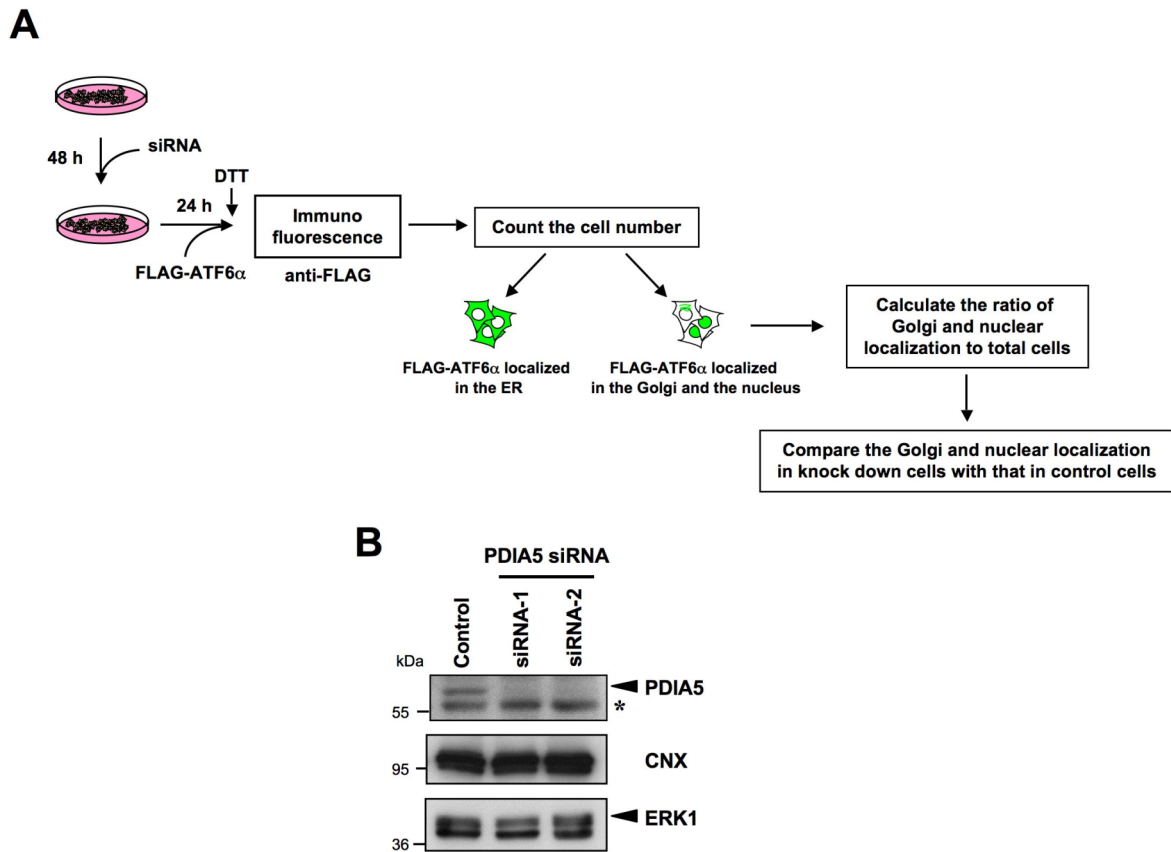

**Fig. S2. Cell-based siRNA assay.** (A) Schematic representation of the quantification method utilized for FLAG-ATF6 $\alpha$  localization in control- or siRNA-transfected cells. HeLa cells were transfected with 25 nM siRNAs. Forty-eight hours after cells were then transfected with FLAG-tagged ATF6 $\alpha$  (FLAG-ATF6 $\alpha$ ) for 24 h. Transfected cells were treated with 1 mM DTT for 2 h and co-stained with anti-FLAG and anti-CN $\alpha$  or anti-Giantin antibodies. All transfected cells were counted for the presence of FLAG-ATF6 $\alpha$  in the ER, Golgi apparatus and nucleus. The ratio of cells localized in the Golgi apparatus and the nucleus to all FLAG-ATF6 $\alpha$ -expressed and siRNA-transfected cells was calculated and compared with that in control cells. (B) The expression of PDIA5 proteins was silenced in HeLa cells by 25 nM siRNAs. Forty-eight hours after siRNA transfection, cell lysates were prepared using RIPA buffer and analysed by immunoblotting using antibodies against PDIA5 (1:500). Anti-CN $\alpha$  and anti-ERK1 antibodies were used as loading controls. The asterisk shows a nonspecific protein recognized by anti-PDIA5 antibodies.

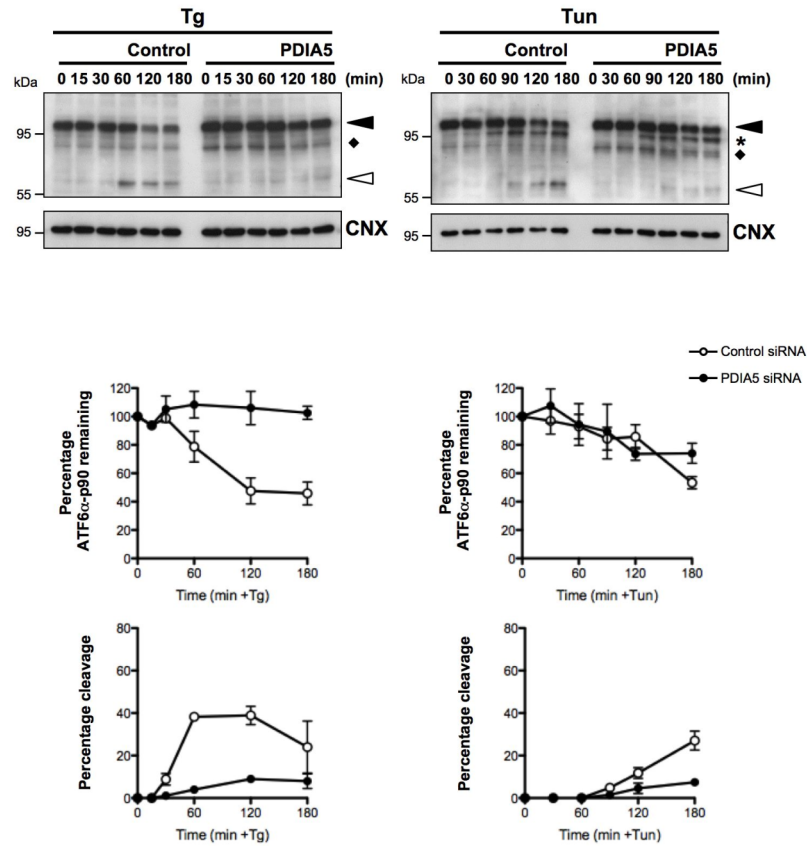

**Fig. S3. Impact of PDIA5 silencing on ATF6 $\alpha$  activation.** Cleavage of endogenous ATF6 $\alpha$  in HeLa cells exposed to Tg (500 nM) or Tun (5  $\mu$ g/ml) as analyzed by immunoblot using anti-ATF6 $\alpha$  antibodies. Full length and cleaved form of ATF6 $\alpha$  indicates as black and white arrowheads, respectively. The asterisk shows the non-glycosylated form of ATF6 $\alpha$  (right top panel). The black diamond represent a nonspecific protein recognized by mouse monoclonal anti-ATF6 $\alpha$  antibodies. Time course quantification of full length (ATF6 $\alpha$ -p90) and cytosolic portion (ATF6 $\alpha$ -p50) of ATF6 $\alpha$  upon treatment with the indicated ER stressor (bottom graphs).

**A**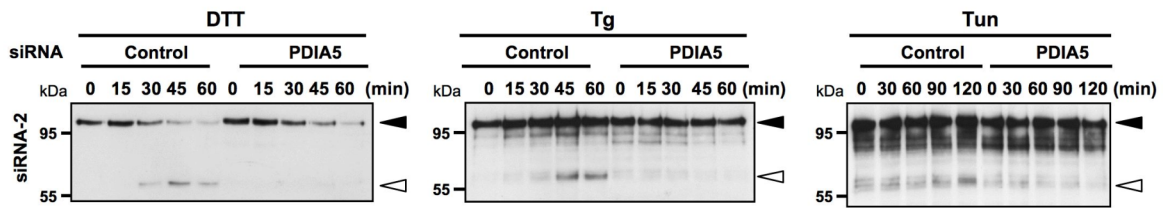**B**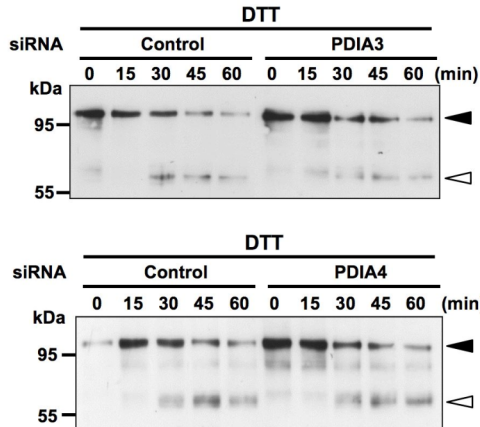**C**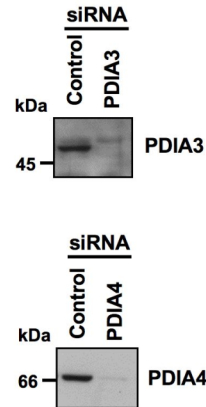

**Fig. S4. Impact of PDIA3, PDIA4 and PDIA5 silencing on ATF6 $\alpha$  activation.** (A) siRNA against PDIA5 used in validation screen was transfected into HeLa cells stably expressing FLAG-ATF6 $\alpha$  (HeLa-ATF6 $\alpha$ ). Seventy-two hours after siRNA transfection, cells were treated with DTT (1 mM), Tg (500 nM) or Tun (5  $\mu$ g/ml) for the indicated time. Cell lysates were analyzed by immunoblotting using anti-ATF6 $\alpha$  antibodies. ATF6 $\alpha$ -p90 and ATF6 $\alpha$ -p50 indicate as black and white arrowheads, respectively. (B) siRNAs against PDIA3 or PDIA4 were transfected into HeLa-ATF6 $\alpha$  cells for 72 h. Cells were then treated with 1 mM DTT for the indicated period of time as in (A) and cell lysates were analyzed by immunoblotting using anti-ATF6 $\alpha$  antibodies. (C) Expression of PDIA3 or PDIA4 was silenced in HeLa cells by 25 nM of siRNAs for 48 h. Cell lysates prepared by using RIPA buffer were analyzed by immunoblotting with antibodies against PDIA3 (1:1,000) or PDIA4 (1:4,000).

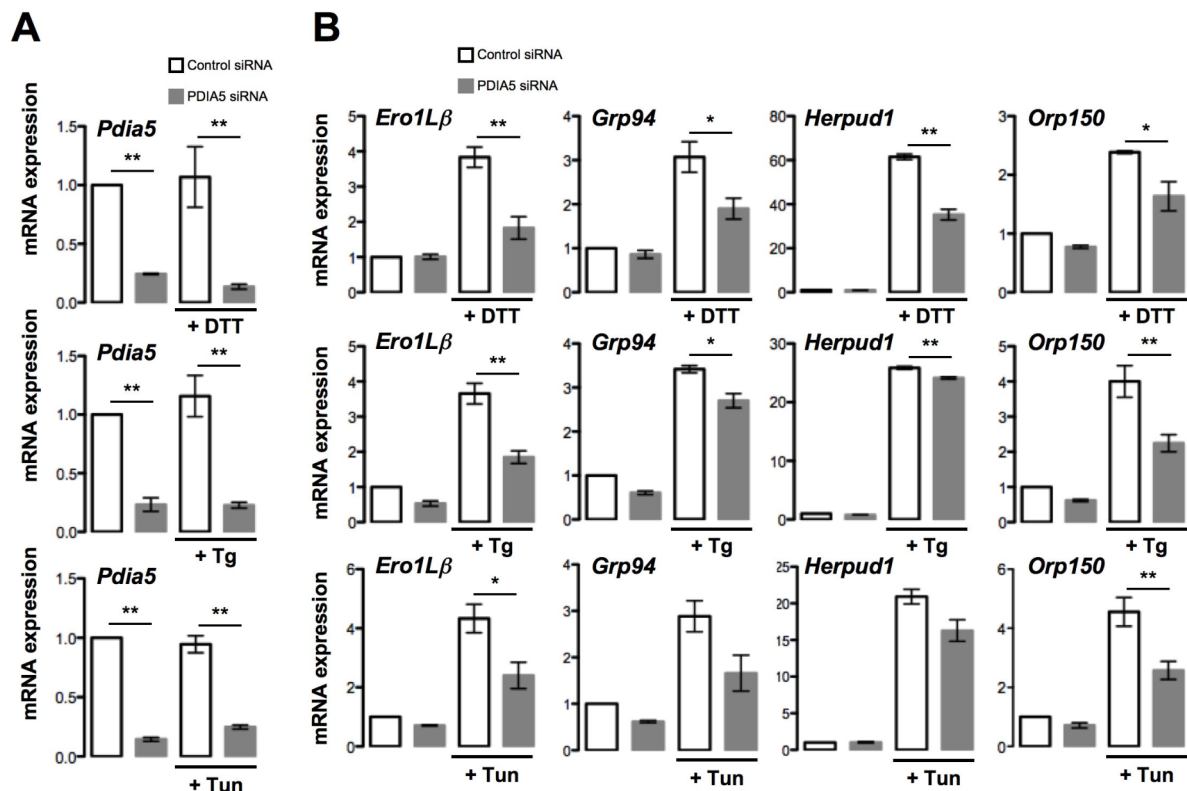

**Fig. S5. Effects of PDIA5 silencing on ATF6 $\alpha$  target genes and UPR signalling.** (A) Expression of *Pdia5* mRNA upon silencing of PDIA5 using siRNA (25 nM) in HeLa cells. Forty eight hours after, cells were treated with indicated ER stressor for 2 h. Total RNA was extracted and analysed by q-PCR using primer pair for *Pdia5*. (B) Forty-eight hours after transfection cells were treated with with DTT, Tg or Tun for 2 h. Total RNA was isolated and analyzed by q-PCR using specific primers for ATF6 $\alpha$  target genes (*Ero1Lβ*, *Grp94*, *Herpud1* and *Orp150*). Each mRNA expression was normalized to *Gapdh* mRNA. Data is shown as the average of three independent experiments  $\pm$ SD (\* $p < 0.05$  and \*\* $p < 0.01$ , as compared with control upon DTT treatment).

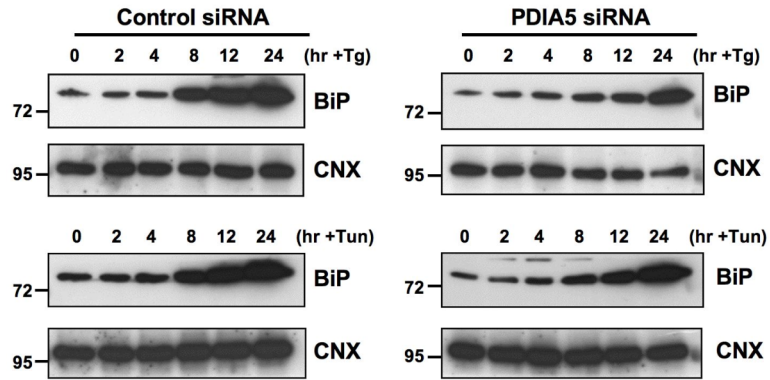

**Fig. S6. Effects of PDIA5 silencing on ATF6 $\alpha$  target genes and UPR signalling.** BiP protein expression in control cells or PDIA5-silenced cells treated or not with Tg (500 nM) or Tun (5  $\mu$ g/ml) was analyzed by immunoblotting using anti-KDEL antibody (upper panels). Anti-CN $X$  antibodies was used as a loading control.



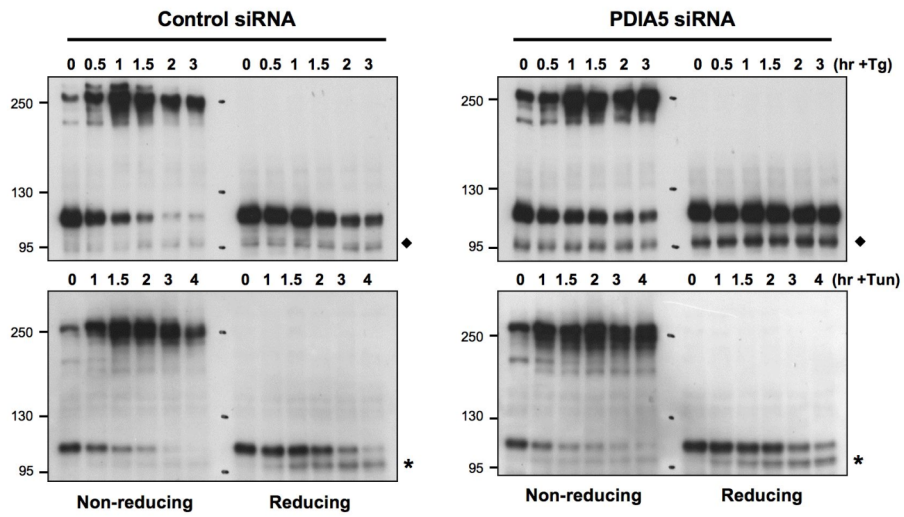

**Fig. S7. Effects of PDIA5 silencing on ATF6 $\alpha$  redox states upon Tg or Tun-mediated ER stress.** Analysis of ATF6 $\alpha$  redox state under conditions of PDIA5 silencing and Tg or Tun-induced ER stress. The asterisk (bottom panels) and black diamond (upper panels) show the non-glycosylated form of ATF6 $\alpha$  and a nonspecific protein recognized anti-ATF6 $\alpha$  antibodies, respectively.

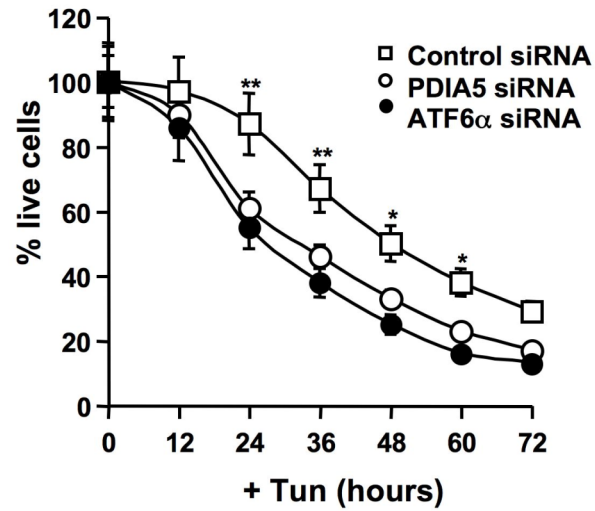

**Fig. S8. Effects of PDIA5 or ATF6 $\alpha$  silencing on ER stress resistance.** HeLa cells were silenced for either PDIA5 or ATF6 $\alpha$  for 48 h and treated with 5  $\mu$ g/ml Tun for the indicated periods of time. Living cells were counted using Sulforhodamine B. Results are presented as the mean of 3 independent experiments  $\pm$  SD.
